# Supplementary material for: Nesfatin-1-Like Peptide Encoded in Nucleobindin-1 in Goldfish is a Novel Anorexigen Modulated by Sex Steroids, Macronutrients and Daily Rhythm
Source: PubMed Central journal article supplement (PMC4916606; doi:10.1038/srep28377), 2016-06-22

**Nesfatin-1-Like Peptide Encoded in Nucleobindin-1 in Goldfish is a Novel Anorexigen Modulated by Sex Steroids, Macronutrients and Daily Rhythm.**

Lakshminarasimhan Sundarrajan, Ayelén Melisa Blanco, Juan Ignacio Bertucci,  
Naresh Ramesh, Luis Fabian Canosa, Suraj Unniappan

**Supplementary Figure 1 – Title page**

**Supplementary Figure 1: Western blot analysis showing the specificity of the NUCB1 antibody used for Western blot analysis and immunohistochemistry.** In figure a below, it is shown that the antibody detects only synthetic NLP, but not nesfatin-1. In the figure b, the NLP staining disappeared when the antibody was pre-absorbed with goldfish synthetic NLP.

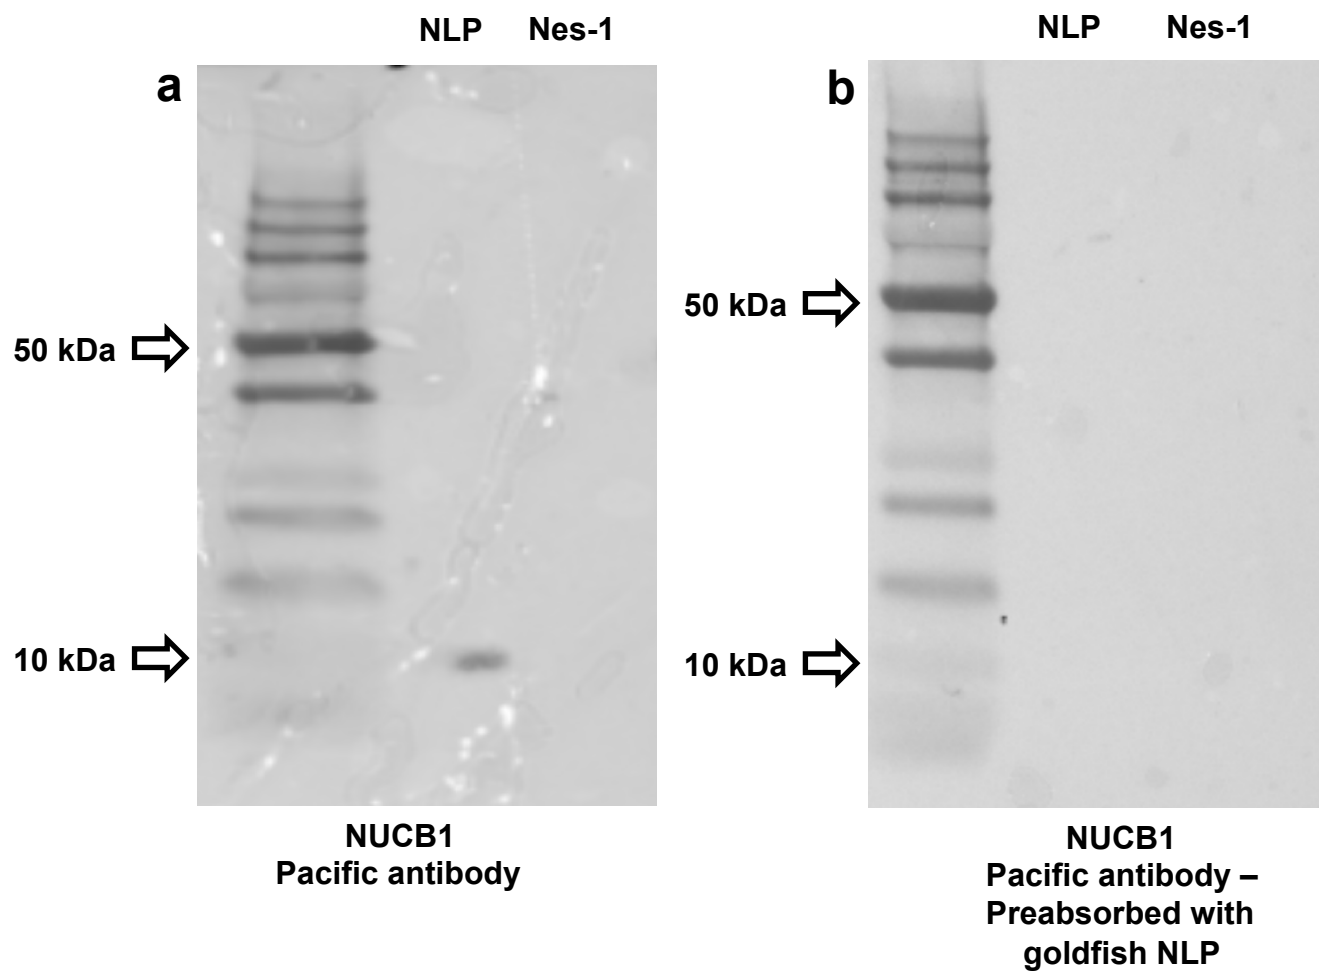

Supplement: srep28377-s1.pdf [file srep28377-s1.pdf]
